# Supplementary material for: Interactions of AMTN, ODAM and SCPPPQ1 proteins of a specialized basal lamina that attaches epithelial cells to tooth mineral
Source: PubMed Central journal article supplement (PMC5402393; doi:10.1038/srep46683), 2017-04-24
Supplement: srep46683-s1.pdf [file srep46683-s1.pdf]

# Interactions of AMTN, ODAM and SCPPPQ1 proteins of a specialized basal lamina that attaches epithelial cells to tooth mineral

Aurélien Fouillen<sup>1,2</sup>, Juliana Dos Santos Neves<sup>1</sup>, Charline Mary<sup>2</sup>, Jean-Daniel Castonguay<sup>1</sup>, Pierre Moffatt<sup>3</sup>, Christian Baron<sup>2</sup>, Antonio Nanci<sup>1,2\*</sup>

<sup>1</sup> Laboratory for the Study of Calcified Tissues and Biomaterials, Department of Stomatology, Faculty of Dentistry, and <sup>2</sup> Department of Biochemistry and Molecular Medicine, Faculty of Medicine, Université de Montréal, Montréal, Québec, Canada.

<sup>3</sup> Shriners Hospital for Children, Montréal, Québec, Canada.

\*Corresponding author: Antonio Nanci  
Laboratory for the Study of Calcified Tissues and Biomaterials,  
Department of Stomatology, Faculty of Dentistry,  
Université de Montréal, Montréal, Québec, Canada  
e-mail: [antonio.nanci@umontreal.ca](mailto:antonio.nanci@umontreal.ca)

Fig S1

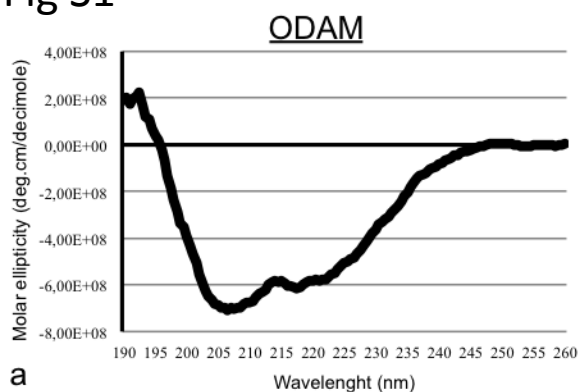

a

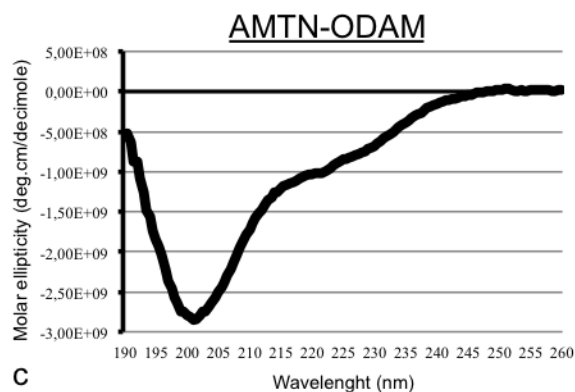

c

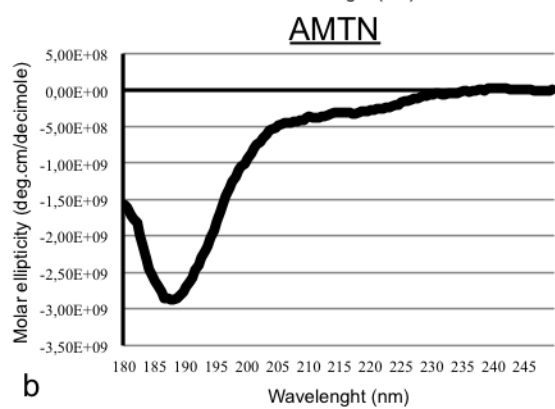

b

d

|                  | ODAM  | AMTN   | ODAM-AMTN |
|------------------|-------|--------|-----------|
| <i>Helix 1</i>   | 0     | 0.01   | 0.38      |
| <i>Helix 2</i>   | 0.03  | 0.03   | 0.16      |
| <i>Strand 1</i>  | 0.23  | 0.26   | 0.10      |
| <i>Strand 2</i>  | 0.12  | 0.14   | 0.08      |
| <i>Turns</i>     | 0.13  | 0.12   | 0.10      |
| <i>Unordered</i> | 0.47  | 0.44   | 0.18      |
| <i>Total</i>     | 1     | 1      | 1         |
| <i>NMRSD</i>     | 0.08  | 0.059  | 0.001     |
| <i>MRW</i>       | 111.5 | 103.34 | 107.5     |

Fig S2

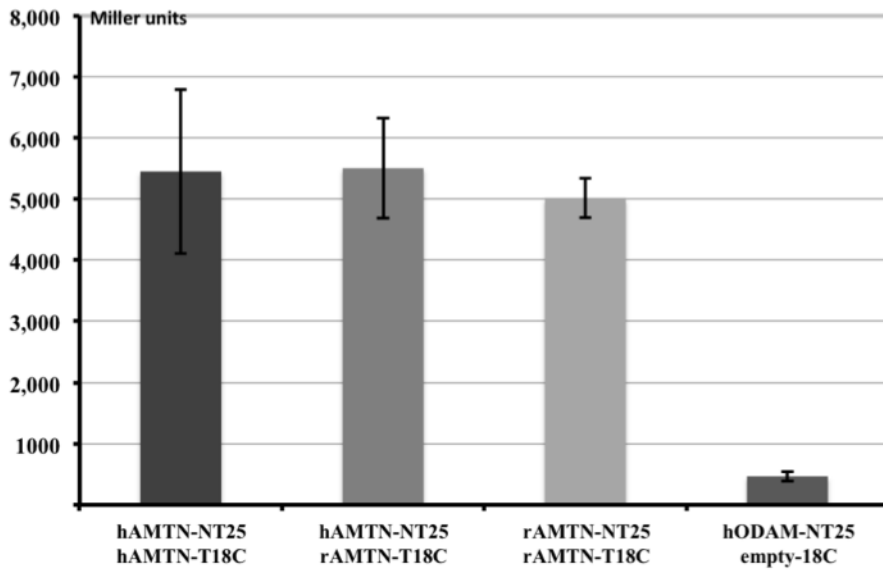

Fig S3

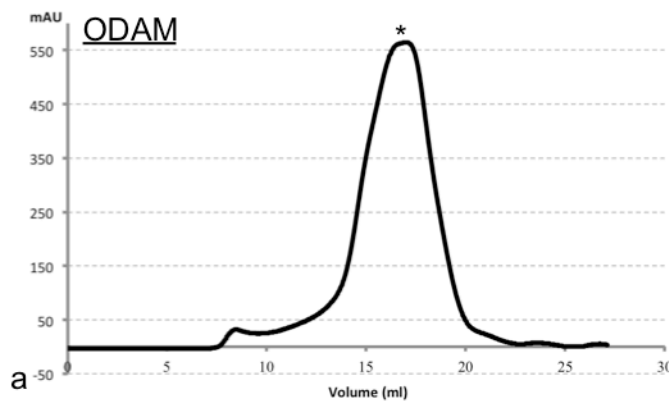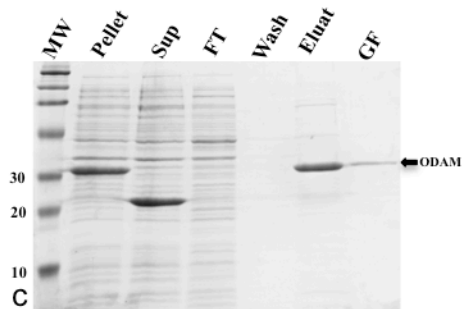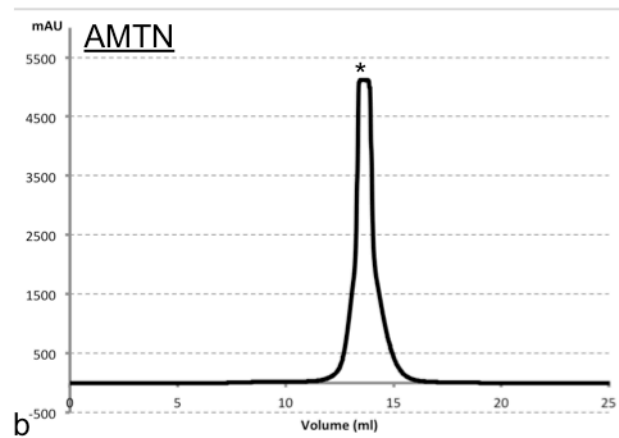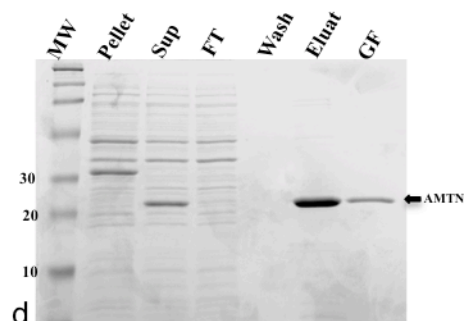

**Table S4 : Primers and restriction site for cloning procedures**

| Protein       | Strain         | Direction | Primer                                | Restriction site |
|---------------|----------------|-----------|---------------------------------------|------------------|
| human ODAM    | pHT            | Forward   | 5' CGGGGTACCATGGCCCCACTTATCCCAC 3'    | KpnI             |
|               | pHT            | Reverse   | 5' CGCGGATCCTTACGGTTCCTTAGGCTGTC 3'   | BamHI            |
|               | PUT18 - PKNT25 | Forward   | 5' CGCGGATCCCATGAAAATTATAATTCTT 3'    | BamHI            |
|               | PUT18 - PKNT25 | Reverse   | 5' CGGGGTACCGGTTCCCTTAGGCTGTCAG 3'    | KpnI             |
|               | PUT18C - PKT25 | Forward   | 5' CGCGGATCCCATGAAAATTATAATTCTT 3'    | BamHI            |
|               | PUT18C - PKT25 | Reverse   | 5' CGGGGTACCTATGGTTCCTTAGGCTGT 3'     | KpnI             |
| rat ODAM      | pHT            | Forward   | 5' CGGGGTACCATGAGCAACAGCCATGAGT 3'    | KpnI             |
|               | pHT            | Reverse   | 5' CGCGGATCCTTATGGTTCTCTTAGGCTATC 3'  | BamHI            |
|               | PUT18 - PKNT25 | Forward   | 5' CGCGGATCCCATGAAAATTATAATTCTT 3'    | BamHI            |
|               | PUT18 - PKNT25 | Reverse   | 5' CGGGGTACCCCTGGTTCTCTTAGGCTAT 3'    | KpnI             |
|               | PUT18C - PKT25 | Forward   | 5' CGCGGATCCCATGAAAATTATAATTCTT 3'    | BamHI            |
|               | PUT18C - PKT25 | Reverse   | 5' CGGGGTACCTTATGGTTCTCTTAGGCTA 3'    | KpnI             |
| human AMTN    | pHT            | Forward   | 5' CGCGGATCCATGTTACCACAGCTCAAA 3'     | BamHI            |
|               | pHT            | Reverse   | 5' CCCAAGCTTTTACTGAATTCCATTTGCTG 3'   | HindIII          |
|               | PUT18 - PKNT25 | Forward   | 5' GCTCTAGACATGAGGAGTACGATTCTA 3'     | XbaI             |
|               | PUT18 - PKNT25 | Reverse   | 5' CGCGGATCCCGCTGAATTCCATTTGCTG 3'    | BamHI            |
|               | PUT18C - PKT25 | Forward   | 5' GCTCTAGACATGAGGAGTACGATTCTA 3'     | XbaI             |
|               | PUT18C - PKT25 | Reverse   | 5' CGCGGATCCTTACTGAATTCCATTTGCT 3'    | BamHI            |
| rat AMTN      | pHT            | Forward   | 5' CGGGGTACCATGTTGCCAAGGCAGCT 3'      | KpnI             |
|               | pHT            | Reverse   | 5' GCGGATCCTTACTTAGTTCTATTTGGTGGGT 3' | BamHI            |
|               | PUT18 - PKNT25 | Forward   | 5' GCTCTAGAGATGAAGACCGTGGTTCTC 3'     | XbaI             |
|               | PUT18 - PKNT25 | Reverse   | 5' CGCGGATCCTTAGTTCTATTTGGTGGGT 3'    | BamHI            |
|               | PUT18C - PKT25 | Forward   | 5' GCTCTAGAGATGAAGACCGTGGTTCTC 3'     | XbaI             |
|               | PUT18C - PKT25 | Reverse   | 5' CGCGGATCCTATTTAGTTCTATTTGGT 3'     | BamHI            |
| human SCPPPQ1 | pHT            | Forward   | 5' CGGGGTACCATGCTTGGACAATCTGGAGG 3'   | KpnI             |
|               | pHT            | Reverse   | 5' CGCGGATCCTTATCTCCCAAGGAAGCCC 3'    | BamHI            |
|               | PUT18 - PKNT25 | Forward   | 5' CCCAAGCTTCATGCTTGGACAATCTGGAGG 3'  | HindIII          |
|               | PUT18 - PKNT25 | Reverse   | 5' CGGGATCCCGTCTCCCAAGGAAGCCCT 3'     | BamHI            |
|               | PUT18C - PKT25 | Forward   | 5' GCTCTAGACATGGCTCTGCCCATCCCC 3'     | XbaI             |
|               | PUT18C - PKT25 | Reverse   | 5' CGGGATCCTTATGTCCCAAGGAAGTTCCC 3'   | BamHI            |
| rat SCPPPQ1   | PUT18 - PKNT25 | Forward   | 5' GCTCTAGACATGCTTGGACAATCTGGAGGG 3'  | XbaI             |
|               | PUT18 - PKNT25 | Reverse   | 5' CGGGATCCTTATCTCCCAAGGAAGCCC 3'     | BamHI            |
|               | PUT18C - PKT25 | Forward   | 5' GCTCTAGACATGCTTGGACAATCTGGA 3'     | XbaI             |
|               | PUT18C - PKT25 | Reverse   | 5' CGGGATCCTTATCTCCCAAGGAAGCCC 3'     | BamHI            |

**Supplementary legends:**

**Fig S1: Structural analysis by circular dichroism spectroscopy.** Spectra obtained for (A) ODAM, (B) AMTN, and (C) the mix of ODAM and AMTN. (D) Table of calculated secondary structure.

**Fig S2: Interspecies bacterial two-hybrid interaction analysis.** Here illustrated for AMTN, no significant difference in interaction capacity between the rat and human forms was noted.

**Fig S3: Analysis of expression of hODAM and hAMTN by *E. coli*.** Size exclusion chromatography of (A) hODAM and (B) hAMTN results in single distinct peaks. The hatched lines denote the fractions used for (C-D) SDS-PAGE gels analysis to evaluate purity of the eluted proteins. MW= Molecular weight
